# Supplementary material for: Persistent deep-water formation in the Nordic Seas during Marine Isotope Stages 5 and 4 notwithstanding changes in Atlantic overturning
Source: Copernicus journal article supplement (doi:10.5194/egusphere-2024-3163), 2024-10-28
Supplement: Supplementary file [file egusphere-2024-3163-AC2-supplement.pdf]

# Appendix rebuttal

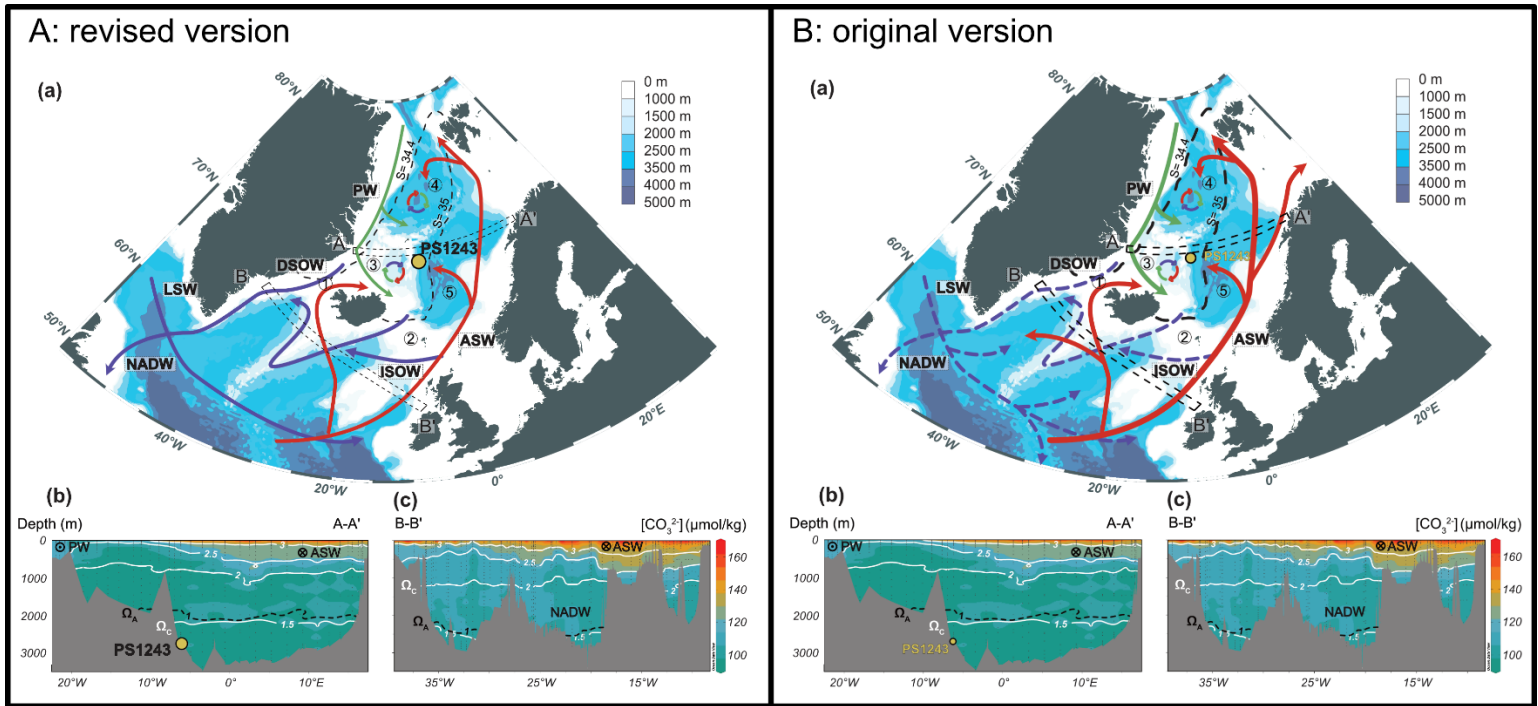

Fig. 1

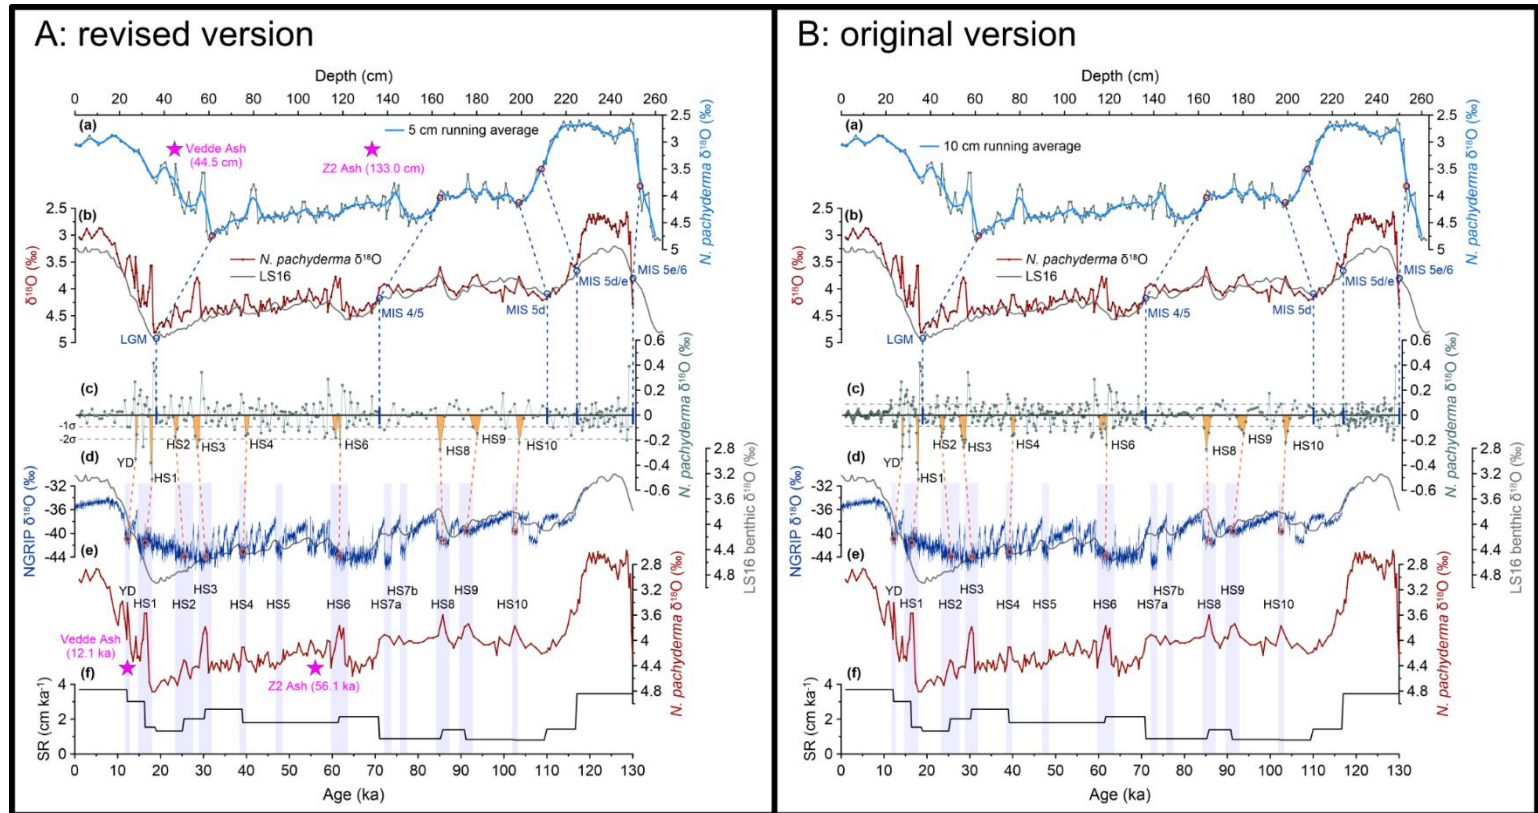

Fig. 2

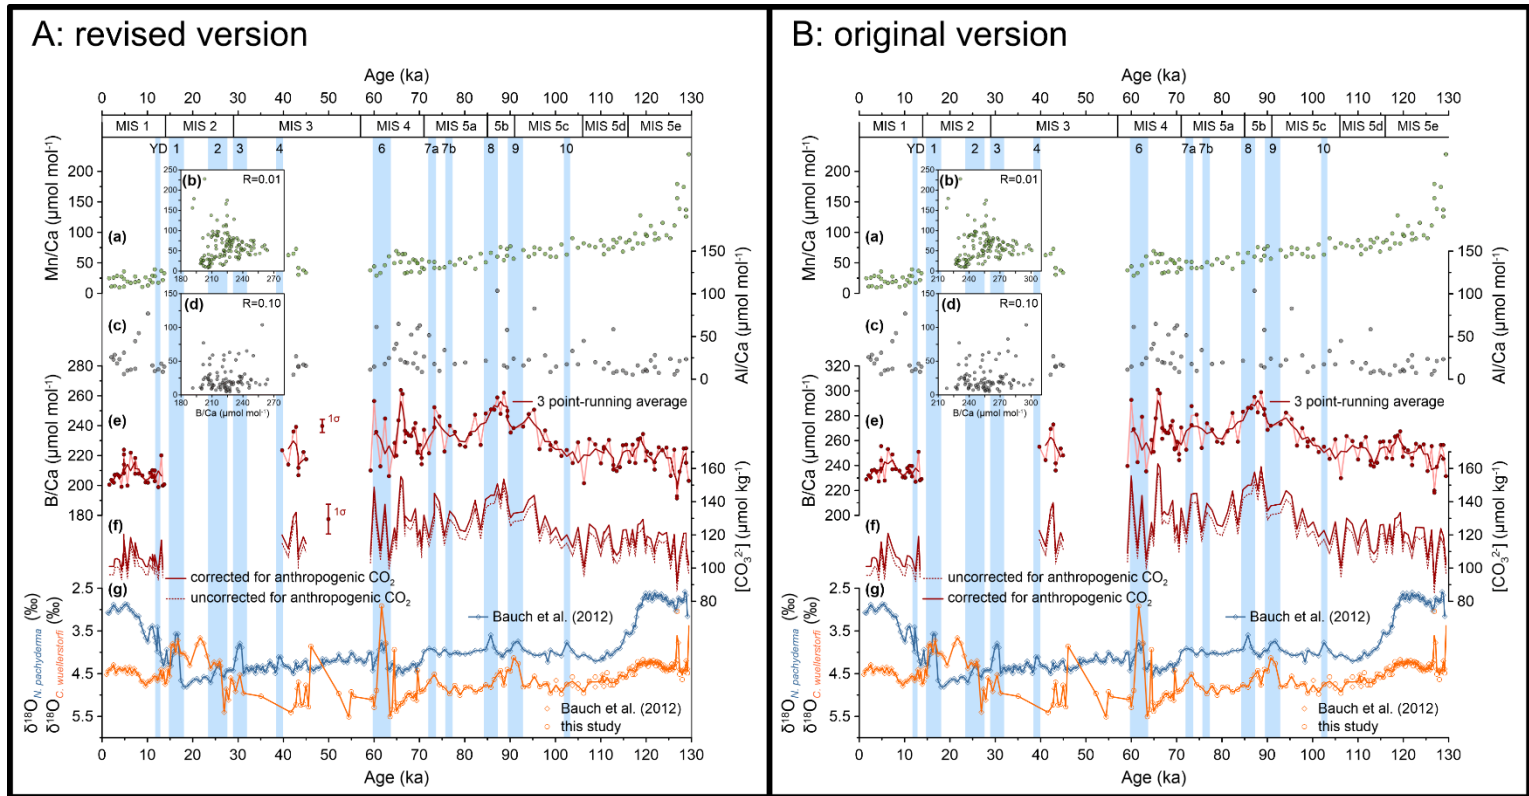

Fig. 3

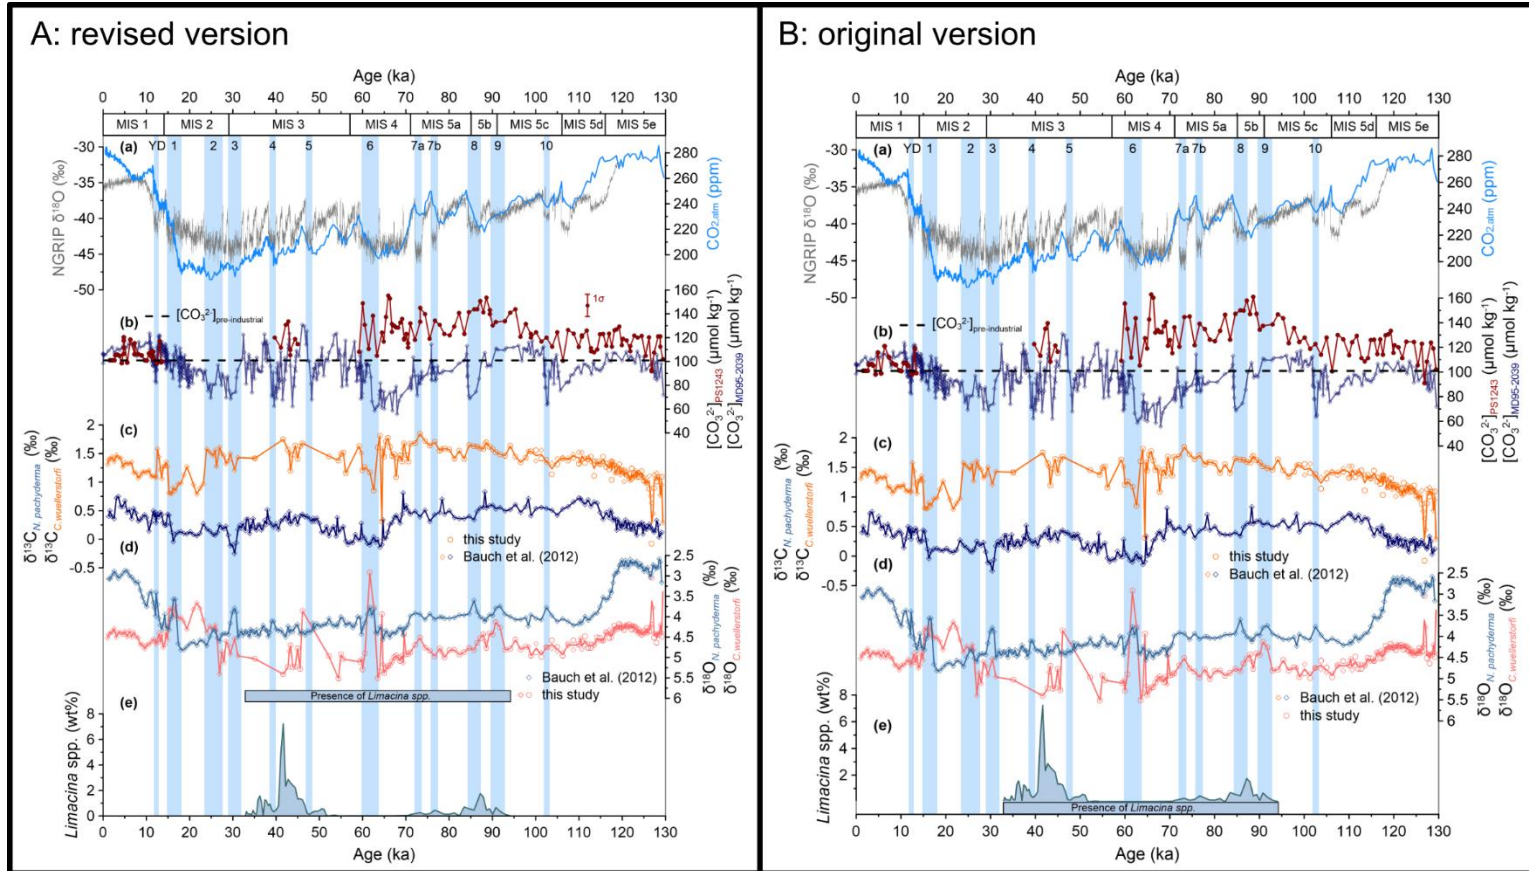

Fig. 4

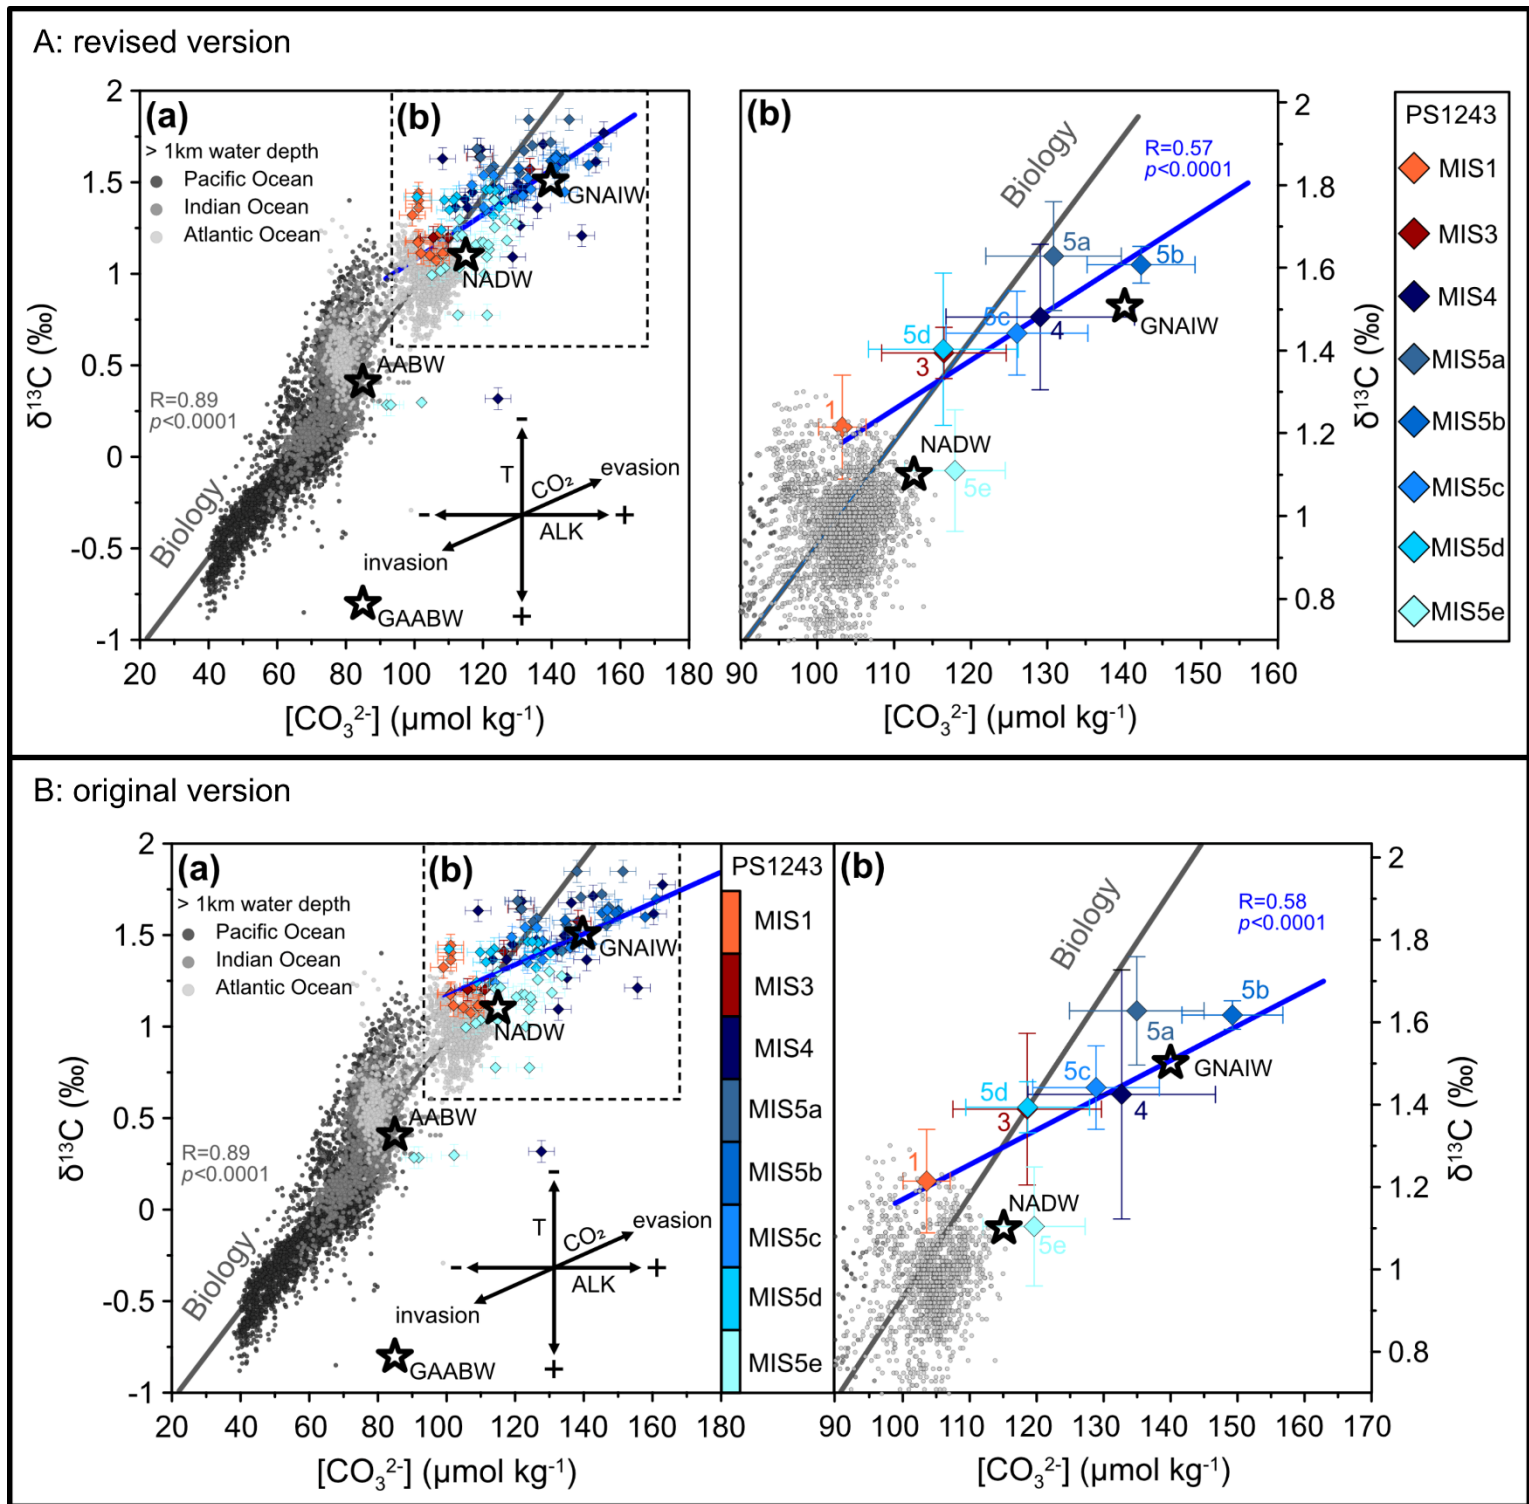

Fig. 5

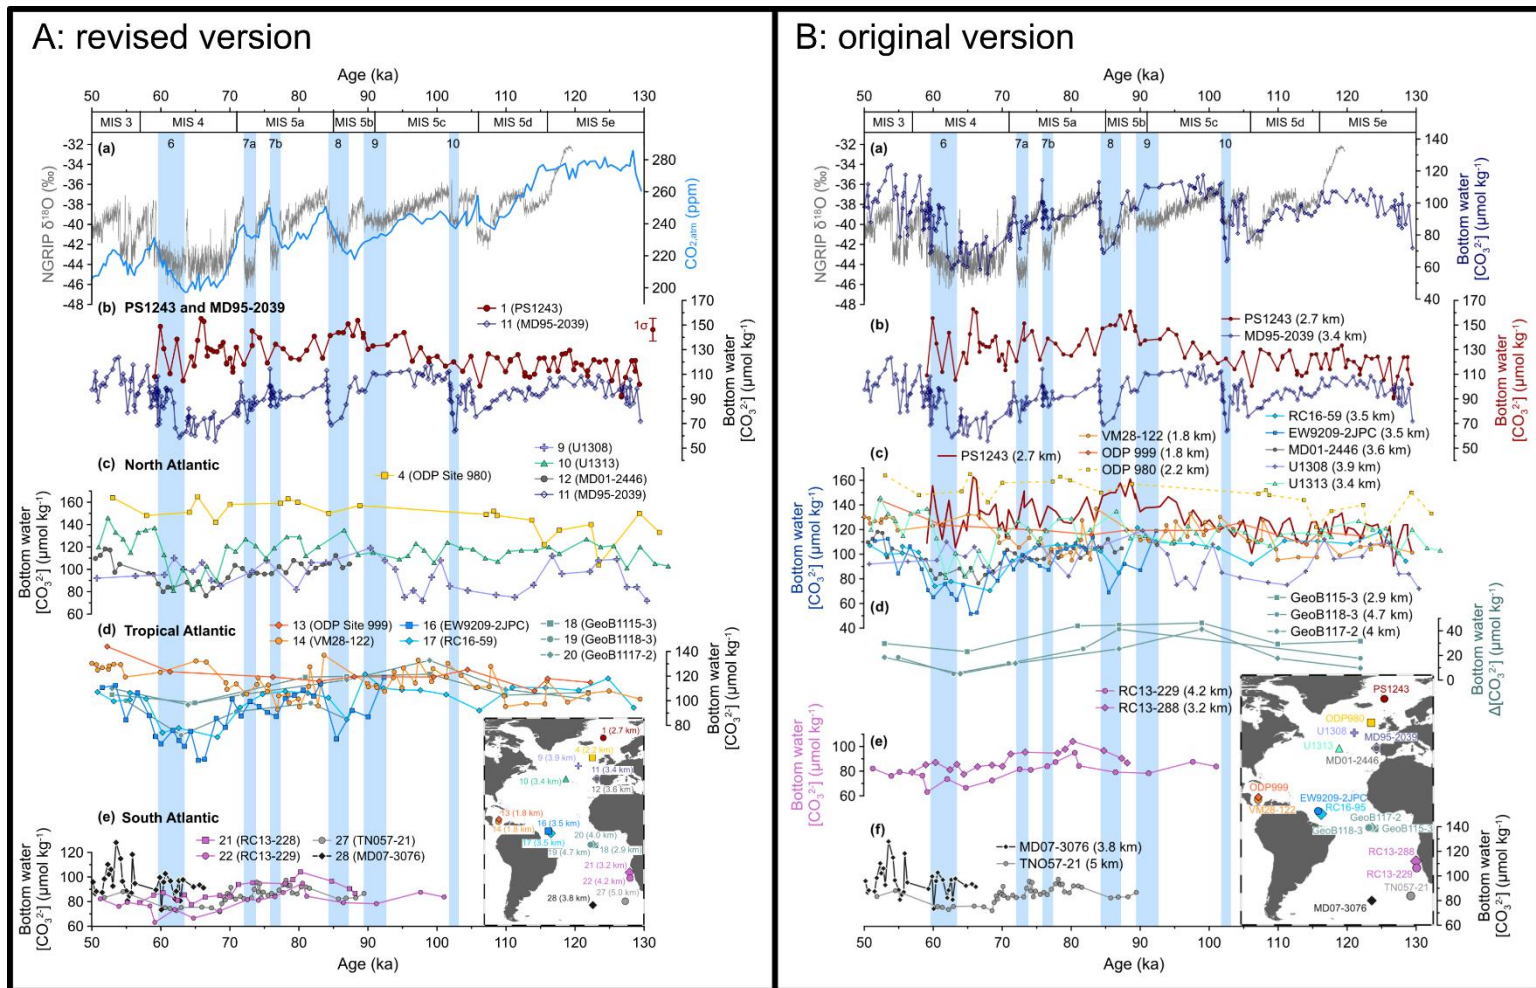

Fig. 6

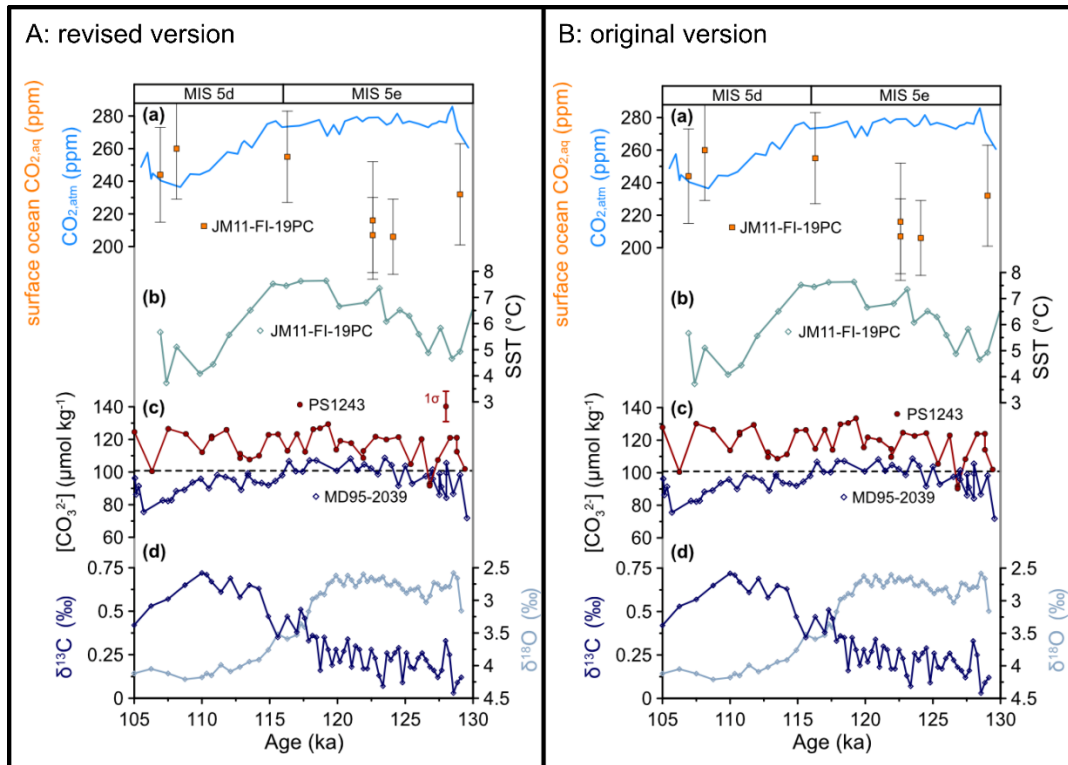

Fig. 7

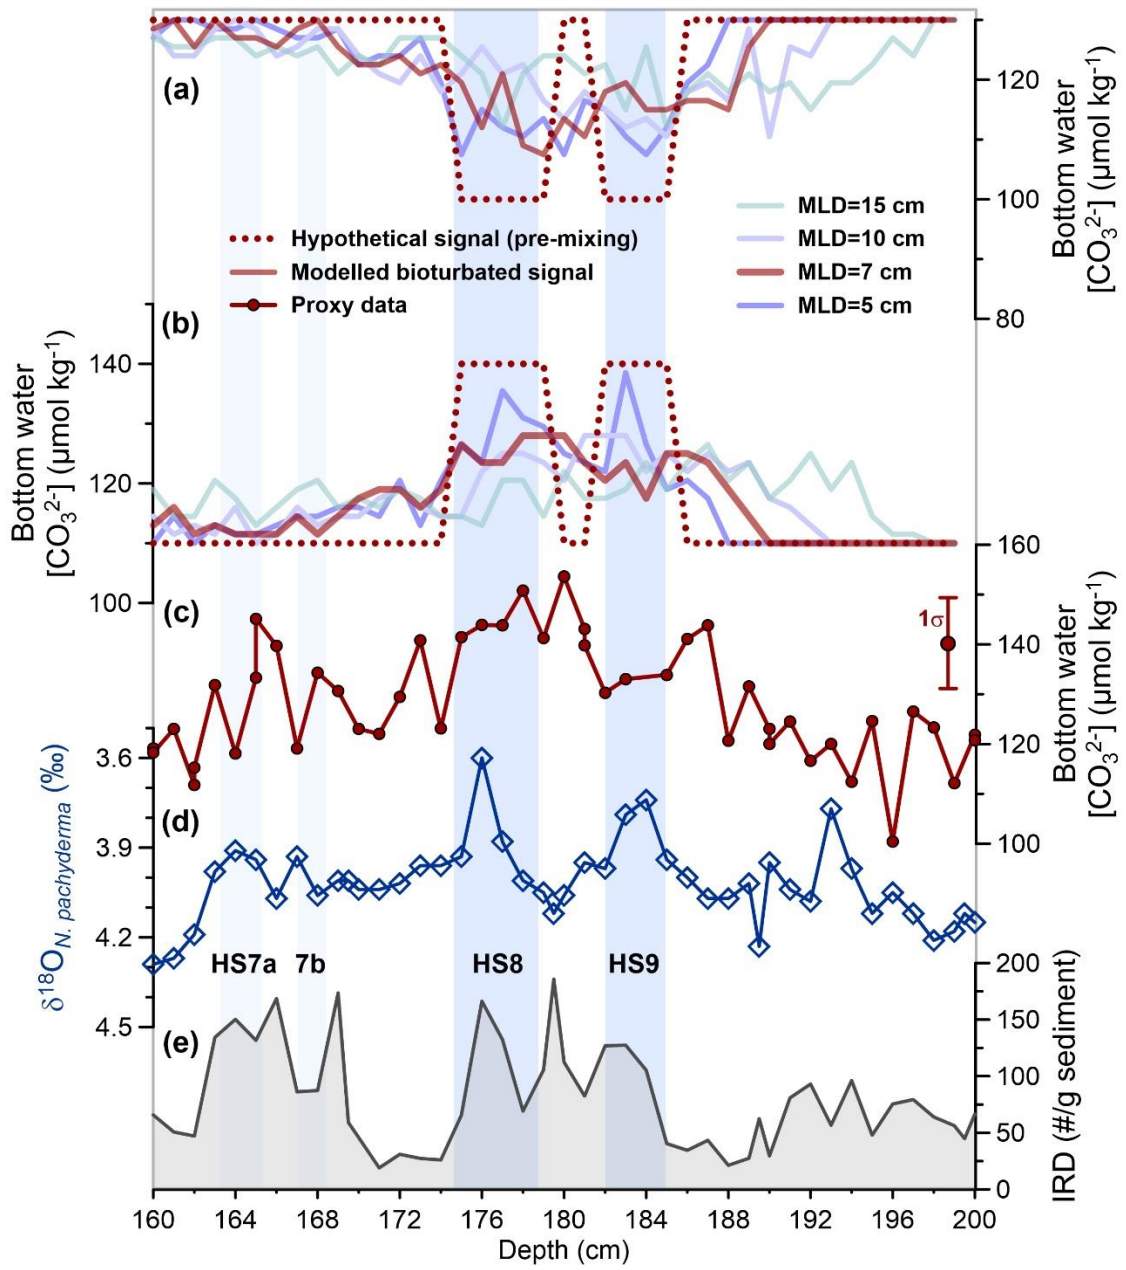

Fig. 8: New Figure

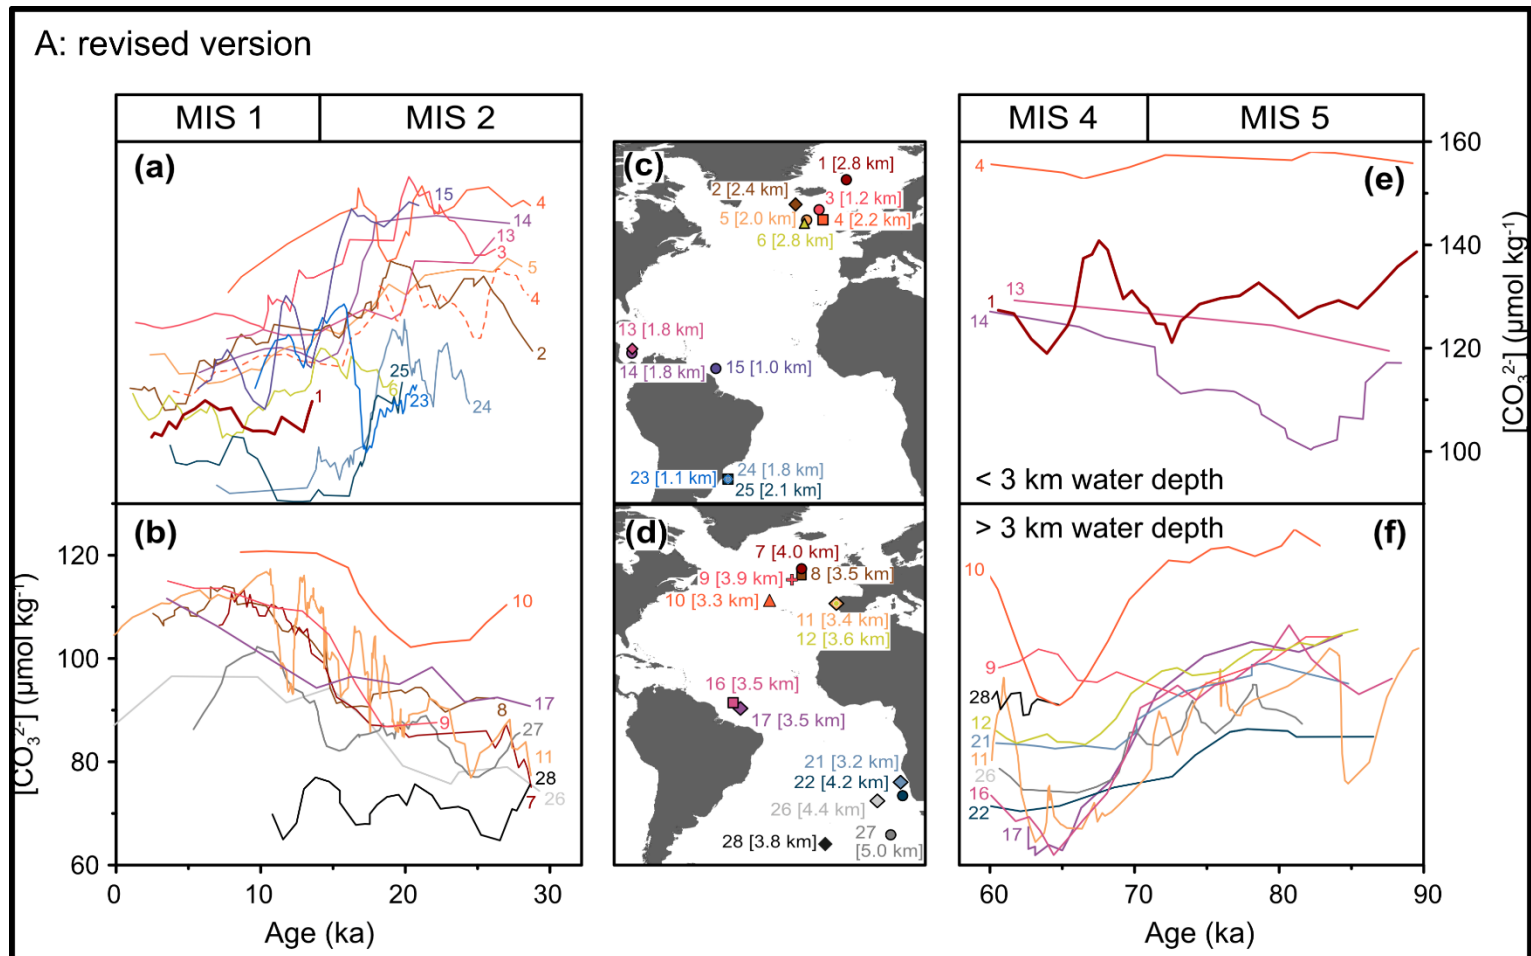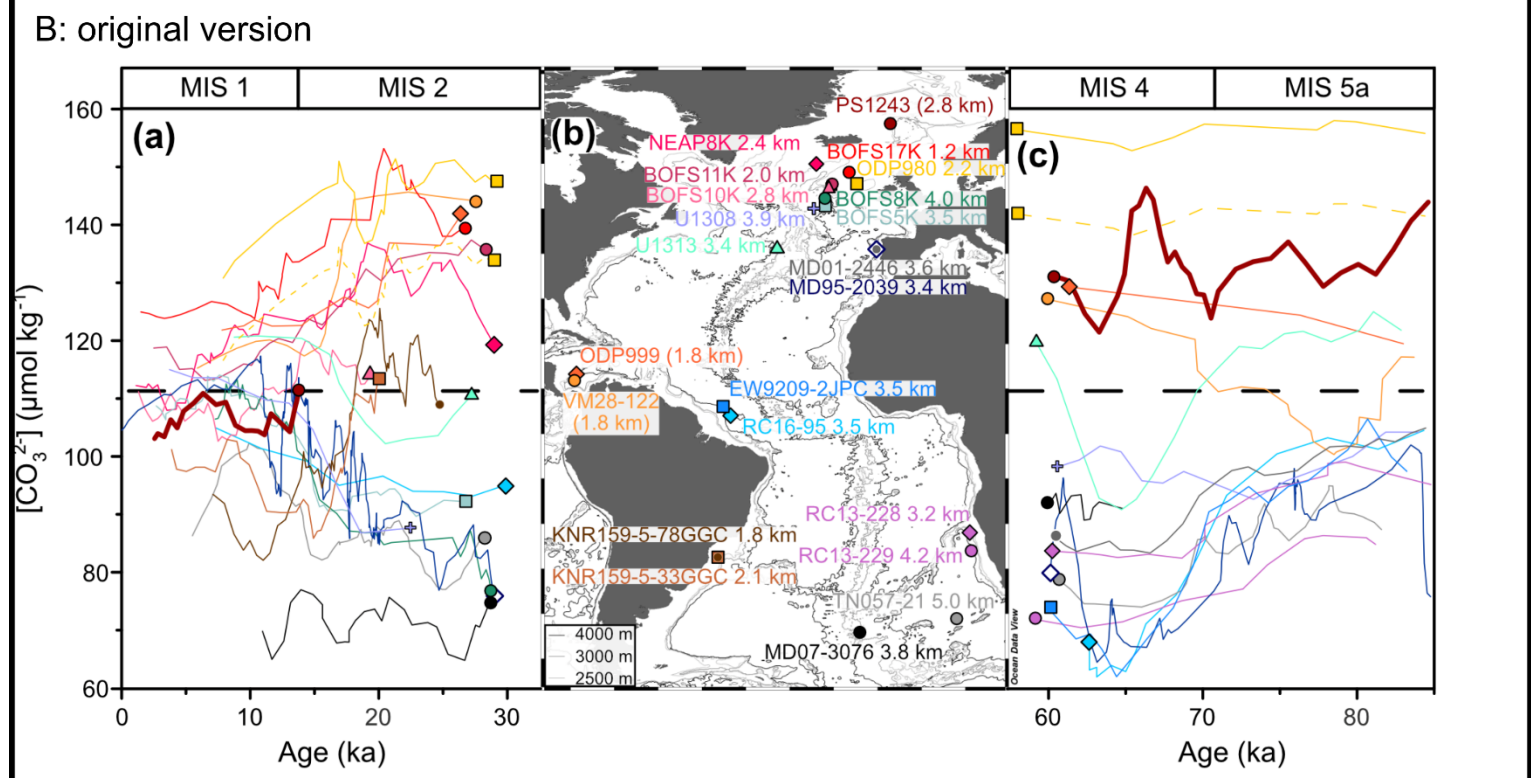

Fig. 9: original Fig. 8
